# Supplementary material for: Evolution of cocoa flavanol analytics: impact on reporting and cross-study comparison
Source: Royal Society of Chemistry journal article supplement (doi:10.1039/d1fo00215e), 2021-01-01
Supplement: d1fo00215e1.pdf [file d1fo00215e1.pdf]

## Supporting Information

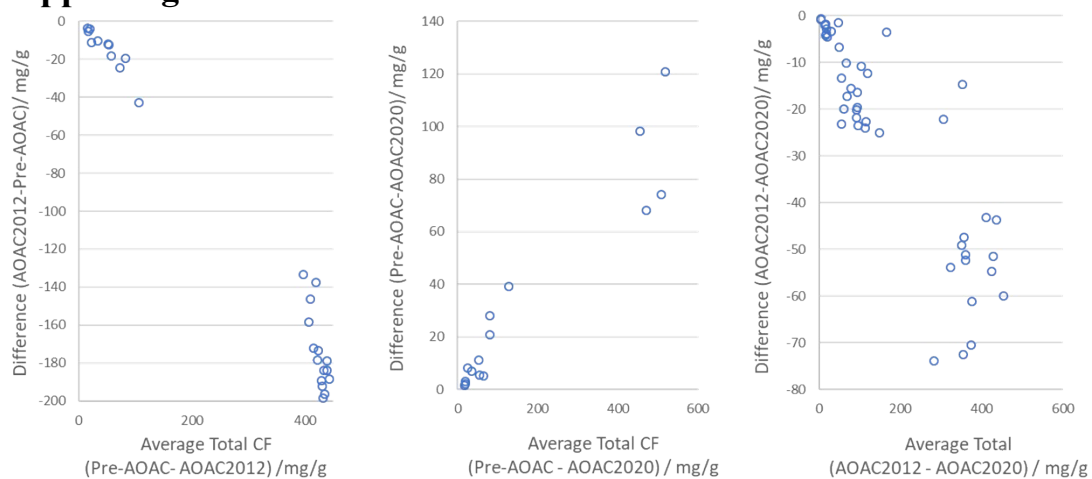

Figure S1. Relative differences between total CF determined by two methods against as a function of the total CF determined by two methods.

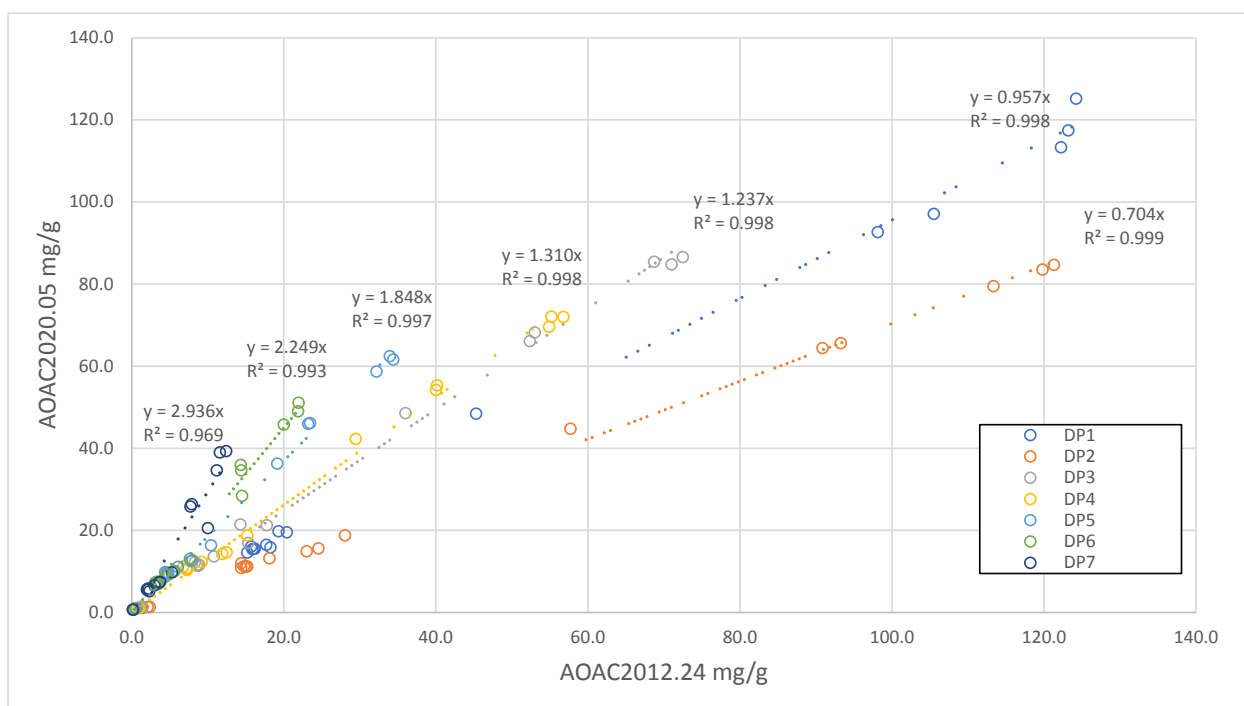

Figure S2. Comparison of individual DP contents measure with AOAC2012.24 and AOAC2020.05 in mg/g. Linear regression, forced through origin show the bias associated with each DP for DP1-7.
